# Supplementary material for: Effects of Normothermic Conditioned Microwave Irradiation on Cultured Cells Using an Irradiation System with Semiconductor Oscillator and Thermo-regulatory Applicator
Source: PubMed Central journal article supplement (PMC5286535; doi:10.1038/srep41244), 2017-02-01
Supplement: srep41244-s1.pdf [file srep41244-s1.pdf]

1 **Effects of Normothermic Conditioned Microwave Irradiation on**  
2 **Cultured Cells Using an Irradiation System with Semiconductor**  
3 **Oscillator and Thermo-regulatory Applicator**

4

5

6 Mamiko Asano<sup>1\*</sup>, Minoru Sakaguchi<sup>1</sup>, Satoshi Tanaka<sup>1</sup>, Keiichiro Kashimura<sup>2</sup>, Tomohiko Mitani<sup>3</sup>,  
7 Masaya Kawase<sup>4</sup>, Hitoshi Matsumura<sup>1</sup>, Takako Yamaguchi<sup>1</sup>, Yoshikazu Fujita<sup>1</sup>, and Katsuyoshi  
8 Tabuse<sup>1</sup>

9

10

11

12 <sup>1</sup>Faculty of Pharmaceutical Sciences, Osaka University of Pharmaceutical Sciences, 4-20-1 Nasahara,  
13 Takatsuki, Osaka 569-1094, Japan

14 <sup>2</sup>Faculty of Engineering, Chubu University, 1200 Matsumoto-cho, Kasugai, Aichi 487-8501, Japan

15 <sup>3</sup>Research Institute for Sustainable Humanosphere, Kyoto University, Gokasho, Uji, Kyoto, 611-0011,  
16 Japan

17 <sup>4</sup>Department of Bioscience, Nagahama Institute of Bio-Science and Technology, 1266 Tamura-cho,  
18 Nagahama, Shiga 526-0829, Japan

19

20

21 \* Correspondence author

22 Email: asanom@gly.oups.ac.jp

23

24

25

26

# Supplementary Figure Legends

## Figure S1. Effects of heating rate under microwave irradiation on viability of HL-60 cells.

(A) Changes in temperature and output of microwave irradiation at the maximum output value of incident waves at 5 W. Microwave irradiation was applied for 0.5 h where the temperature inside the applicator was set at 10°C, while the temperature of the cultured cells in the dishes was set at 37°C. The changes over 0–1 min are shown in the lower panels. (B) Microwave irradiation (described as ‘MW’) was applied for 1 h with the temperature of the cultured cells maintained at 37°C, whereas the temperature inside the applicator was set at 10°C. During irradiation, output could be generated at the maximum value of 20 and 5 W. After the irradiation ceased, cells were moved to a CO<sub>2</sub> incubator and incubated for 24, 48, or 72 h. The negative control cells were incubated at 37°C in a CO<sub>2</sub> incubator rather than being subjected to microwave irradiation. Cellular viability was determined using the WST-8 assay. Rates are shown relative to the absorbance of the negative control, whose values were defined as “100”. The horizontal axes indicate the duration of incubation after irradiation. Data are expressed as the mean ± SD of four independent experiments. Asterisks indicate significant differences from the negative control: \**P* < 0.05, \*\**P* < 0.01. The results of ‘MW (20 W)’ are the same as that of ‘MW (10°C inside Applicator)’ for irradiation time of 1 h in Fig. 3.

## Figure S2. Effects of microwave irradiation at initial irradiation time on viability of HL-60 cells.

Microwave irradiation (described as ‘MW’) was applied for 1 or 5 min with the temperature of the cultured cells maintained at 37°C, whereas the temperature inside the applicator was set at 10°C. During irradiation, output could be generated at the maximum value of 20 W. After the irradiation ceased, cells were moved to a CO<sub>2</sub> incubator and incubated for 24, 48, or 72 h. The negative control cells were incubated at 37°C in a CO<sub>2</sub> incubator rather than being subjected to microwave irradiation. Cellular viability was determined using the WST-8 assay. Rates are shown relative to the absorbance of the negative control, whose values were defined as “100”. The horizontal axes indicate the duration of incubation after irradiation. Data are expressed as the mean ± SD of four independent experiments. Asterisks indicate significant differences from the negative control: \**P* < 0.05, \*\**P* < 0.01. The results

1 of 'MW (1 h)' are the same as that of 'MW (10°C inside Applicator)' for irradiation time of 1 h in  
2 Fig. 3.

3

4 **Figure S3. The Temperature of HL-60 cells Measured by a Fiber-optic Thermometer.**

5 (A) The five points which were measured temperatures by a fiber-optic thermometer. (B) Changes in  
6 temperatures for 0.5 h where the temperature inside the applicator was set at 10°C, while the  
7 temperature of the cultured cells in the dishes was set at 37°C. The changes over 0–1 min are shown  
8 in the lower panels. The condition of microwave irradiation was the same as that for '10°C inside  
9 applicator' in Fig. 6, and the temperature of each point was measured individually at four times.

10

11

12

13

14

15

16

17

18

19

20

21

22

23

24

25

26

1 Figure S1.

(A) 10°C inside Applicator

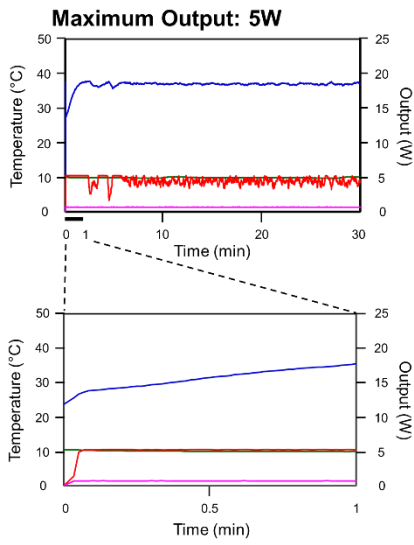

- Cellular Temperature Monitored by Infrared Temperature Sensor (°C)
- Temperature inside Applicator Monitored by Thermistor (°C)
- Output of Incident Wave (W)
- Output of Reflect Wave (W)

(B)

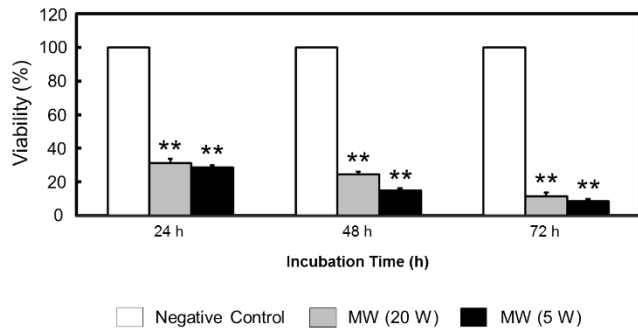

- 2
- 3
- 4
- 5
- 6
- 7

- 8
- 9
- 10
- 11
- 12
- 13
- 14
- 15
- 16
- 17
- 18
- 19
- 20
- 21
- 22

1 Figure S2.

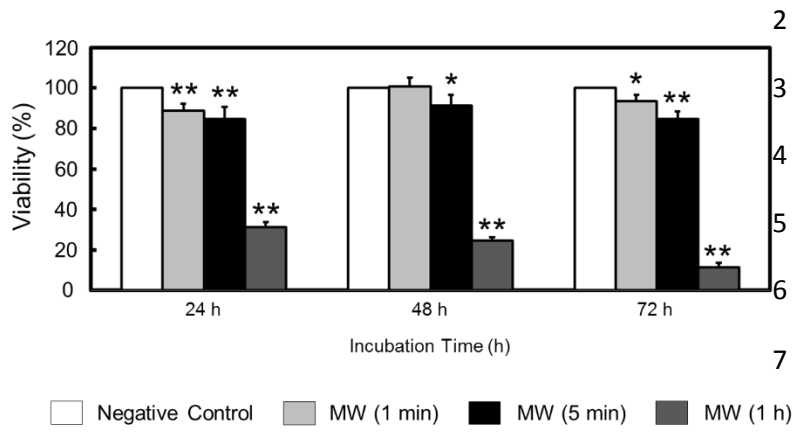

1 Figure S3.

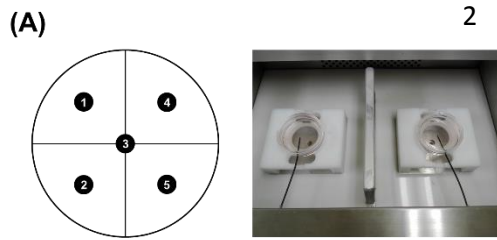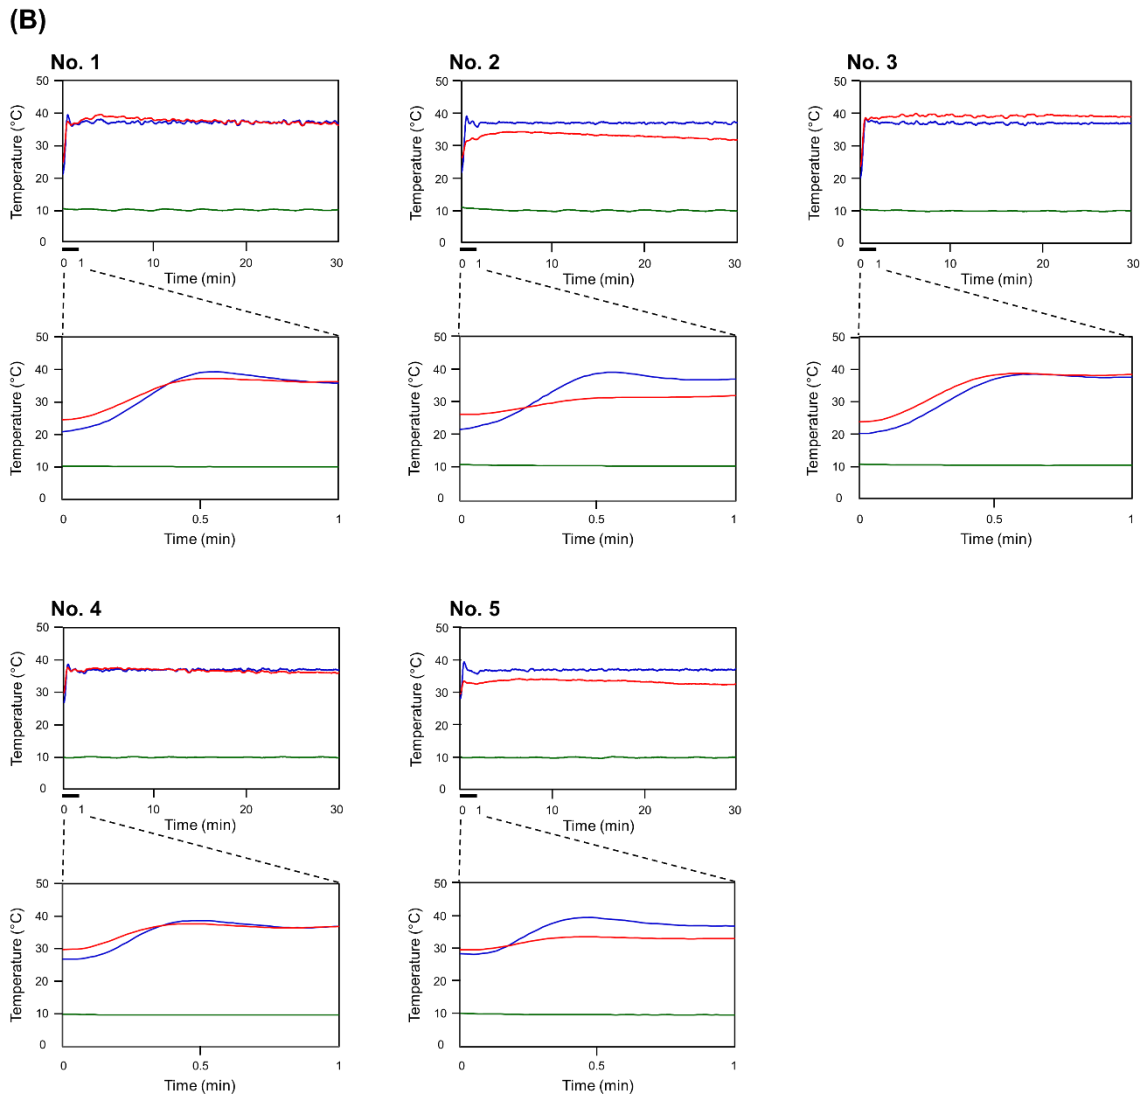

— Cellular Temperature Monitored by Infrared Temperature Sensor (°C)  
— Cellular Temperature Monitored by Fiber-optic Thermometer (°C)  
— Temperature inside Applicator Monitored by Thermistor (°C)

5

6
